# Supplementary material
Source: PubMed Central journal article supplement (PMC4473324)
Supplement: ajcr0005-1471-f6.pdf [file ajcr0005-1471-f6.pdf]

## ALDH1A1 predicts prognosis in glioma

**Table S1.** The sequence of primers, product size and annealing temperature of qRT-PCR

| No. | Methods          | Gene     | Primer Sequence (5'→3')                                | Product Length | TM °C |
|-----|------------------|----------|--------------------------------------------------------|----------------|-------|
| 1   | Real-time RT-PCR | GAPDH    | F: TGTCGTCATGGGTGTGAACC<br>R: ATGGACTGTGGTCATGAGTCC    | 149            | 57    |
| 2   | Real-time RT-PCR | MMP2     | F: CCACTGCCTTCGATACAC<br>R: GAGCCACTCTCTGGAATCTTAAA    | 157            | 58    |
| 3   | Real-time RT-PCR | MMP7     | F: GAGTGAGCTACAGTGGGAACA<br>R: CTATGACGCGGAGTTTAACAT   | 176            | 61    |
| 4   | Real-time RT-PCR | MMP9     | F: GTTCCCGAGTGAGTTGA<br>R: TTTACATGGCACTGCCAAAGC       | 168            | 59    |
| 5   | Real-time RT-PCR | ALDH1A1  | F: CCGTGGCGTACTATGGATGC<br>R: CGCAATGTTTTGATGCAGCCT    | 167            | 62    |
| 6   | Real-time RT-PCR | ALDH1A2  | F: TTGCCAGGATATGGGCCAAC<br>R: TGAATGCAATCTGTCTATGCCA   | 70             | 60    |
| 7   | Real-time RT-PCR | ALDH1A3  | F: GCCCTGGAGACGATGGATAC<br>R: CCCTGGATTTGTCTGCC        | 113            | 60    |
| 8   | Real-time RT-PCR | ALDH1B1  | F: TACCACCGGGGAGGTCATT<br>R: ATCCCGCTCCACTAGGTCTG      | 169            | 62    |
| 9   | Real-time RT-PCR | ALDH1L1  | F: GTTTGCAGAGCTGACATTAAGG<br>R: GATTTTCTCACATCAGGATGGT | 115            | 60    |
| 10  | Real-time RT-PCR | ALDH1L2  | F: TAGTCCAAAGCACGGCTCTAT<br>R: GGTCTGTATCCAAGCCATCA    | 147            | 61    |
| 11  | Real-time RT-PCR | ALDH2    | F: AAATGTCTCCGGTATTATGCCG<br>R: CATCAGGAGCGGAAATCCA    | 144            | 61    |
| 12  | Real-time RT-PCR | ALDH3A1  | F: TGTTCTCCAGCAACGACAAGG<br>R: AGGGCAGAGGTGCAAGGT      | 108            | 62    |
| 13  | Real-time RT-PCR | ALDH3A2  | F: CTCCCTCAGTATTAGACCAGGA<br>R: CCCTCCAGTCAAGAGTCAC    | 180            | 60    |
| 14  | Real-time RT-PCR | ALDH3B1  | F: AAGCCATCGGAGATTAGCAAGA<br>R: GCTCTGGTCCACGTATTGGG   | 72             | 61    |
| 15  | Real-time RT-PCR | ALDH3B2  | F: TCATCGCACCTGGAACACTAC<br>R: CTGGCTGATTTCTGACGGCT    | 104            | 61    |
| 16  | Real-time RT-PCR | ALDH4A1  | F: TCTGTTATGCAGACAAGAGCCT<br>R: GATCACGGTCTTACCCTGTCC  | 188            | 61    |
| 17  | Real-time RT-PCR | ALDH5A1  | F: GACCTTGCCAGAATAATCACAGC<br>R: GGGTGTGGATAATGTCTCCGT | 136            | 61    |
| 18  | Real-time RT-PCR | ALDH6A1  | F: TTCAGTGCCAACTGTAAAGCTC<br>R: TGAGGGACCCGACCAATGA    | 114            | 61    |
| 19  | Real-time RT-PCR | ALDH7A1  | F: TATTGCCCTGCTAACACGAG<br>R: GCATCGCCAATCTGTCTTACT    | 155            | 60    |
| 20  | Real-time RT-PCR | ALDH8A1  | F: ATGGCTGGAACAAACGCACT<br>R: CCCTGTTGATGGGTCGTAAGAA   | 99             | 62    |
| 21  | Real-time RT-PCR | ALDH9A1  | F: GTCGCAGCCGCTCAATTAC<br>R: CCTTTGCATTTTGAACAGCCAA    | 155            | 61    |
| 22  | Real-time RT-PCR | ALDH16A1 | F: CAGACGGGCTGTATGAGTATCT<br>R: ATGGAGTTGCCAGACGAATC   | 233            | 61    |
| 23  | Real-time RT-PCR | ALDH18A1 | F: GCCCTTCAACCAACATCTTCT<br>R: AGGGGTACAGTGATAAACGGG   | 126            | 60    |

# ALDH1A1 predicts prognosis in glioma

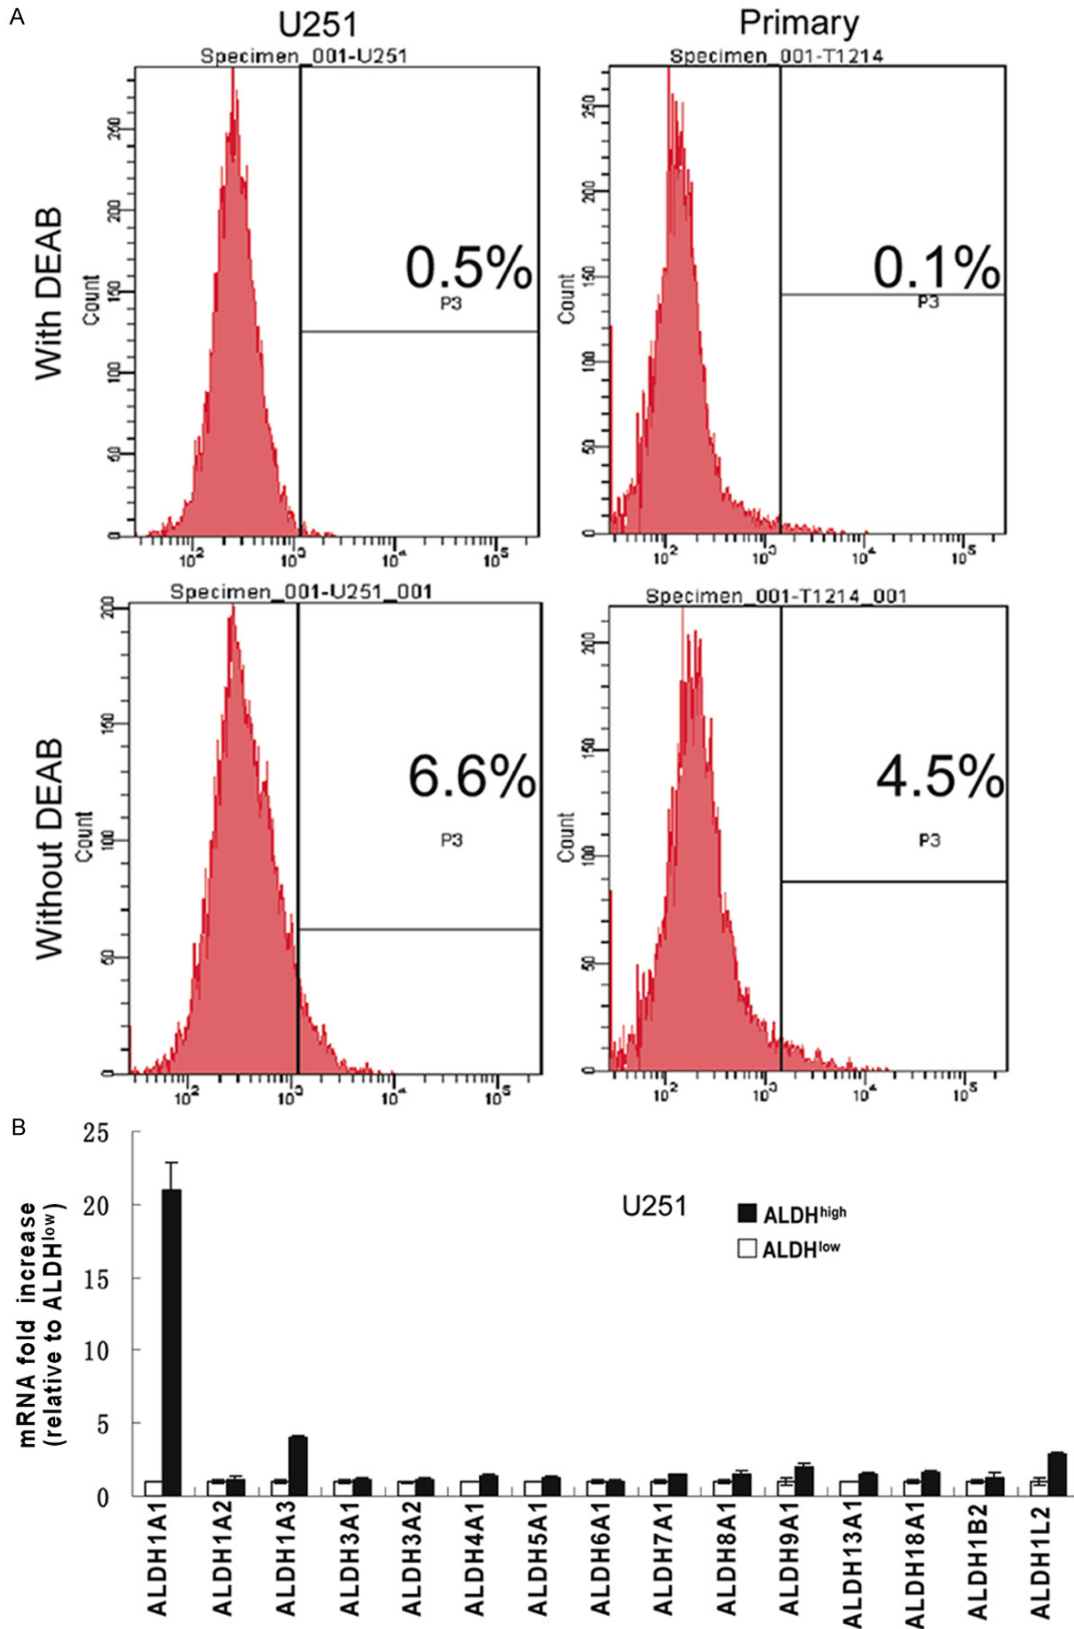

**Figure S1.** Subtype identification of ALDH family in ALDH<sup>high</sup> and ALDH<sup>low</sup> cells by flow cytometry. A. Detection of the frequency of ALDH<sup>high</sup> cells in U251 cell line and a primary GBM by flow cytometry. B. qRT-PCR examination of expression of each member of ALDH family in ALDH<sup>high</sup> and ALDH<sup>low</sup> cells indicates that ALDH1A1 is a main subtype in ALDH<sup>high</sup> cells.
